# Supplementary material
Source: publisher figshare collection journal article supplement (https://acs.figshare.com/ndownloader/files/11155556)
Supplement: Supplementary file 1 [file 11155556]

Compound_ID	SMILES	EC50	Quantum yield (_
1	NCCCC[C@@H](C(OC(C)(C)C)=O)NC(N[C@@H](C(OC(C)(C)C)=O)CCC(OC(C)(C)C)=O)=O
2	O=C(O)[C@@H](NC(N[C@@H](C(O)=O)CCC(O)=O)=O)CCCCNC(CCCCC[N](C(C=CC(S(=O)(O)=O)=C1)=C1C2(C)C)=C2/C=C/C=C(C(C)3C)/N(CCCCCC(NCCCCN=[N+]=[N-])=O)C4=C3C=C(C=C4)S(=O)(O)=O)=O
3	C#CC[N+](CB(F)(F)F)(C)C
4	O=C(O)[C@@H](NC(N[C@@H](C(O)=O)CCC(O)=O)=O)CCCCNC(CCCCC[N](C(C=CC(S(=O)(O)=O)=C1)=C1C2(C)C)=C2/C=C/C=C(C(C)3C)/N(CCCCCC(NCCCCN4N=NC(C[N](CB(F)(F)F)(C)C)=C4)=O)C5=C3C=C(C=C5)S(=O)(O)=O)=O	6.74�1.33 nM	0.6
Cy3.18.OH	OC(CCCCCN1C(C=CC(S(=O)(O)=O)=C2)=C2C(C)(C)/C1=C/C=C/C3=[N+](CCCCCC(O)=O)C4=C(C=C(S(=O)(O)=O)C=C4)C3(C)C)=O		0.4
